# Supplementary material
Source: publisher site journal article supplement (https://www.dovepress.com/get_supplementary_file.php?f=424055.docx)
Supplement: Supplementary file 1 [file get_supplementary_file.php]

# Supplementary material

### Supplementary Figure 1. Kaplan–Meier analysis of time to first asthma-related exacerbation post-treatmenta with FF/UMEC/VI.


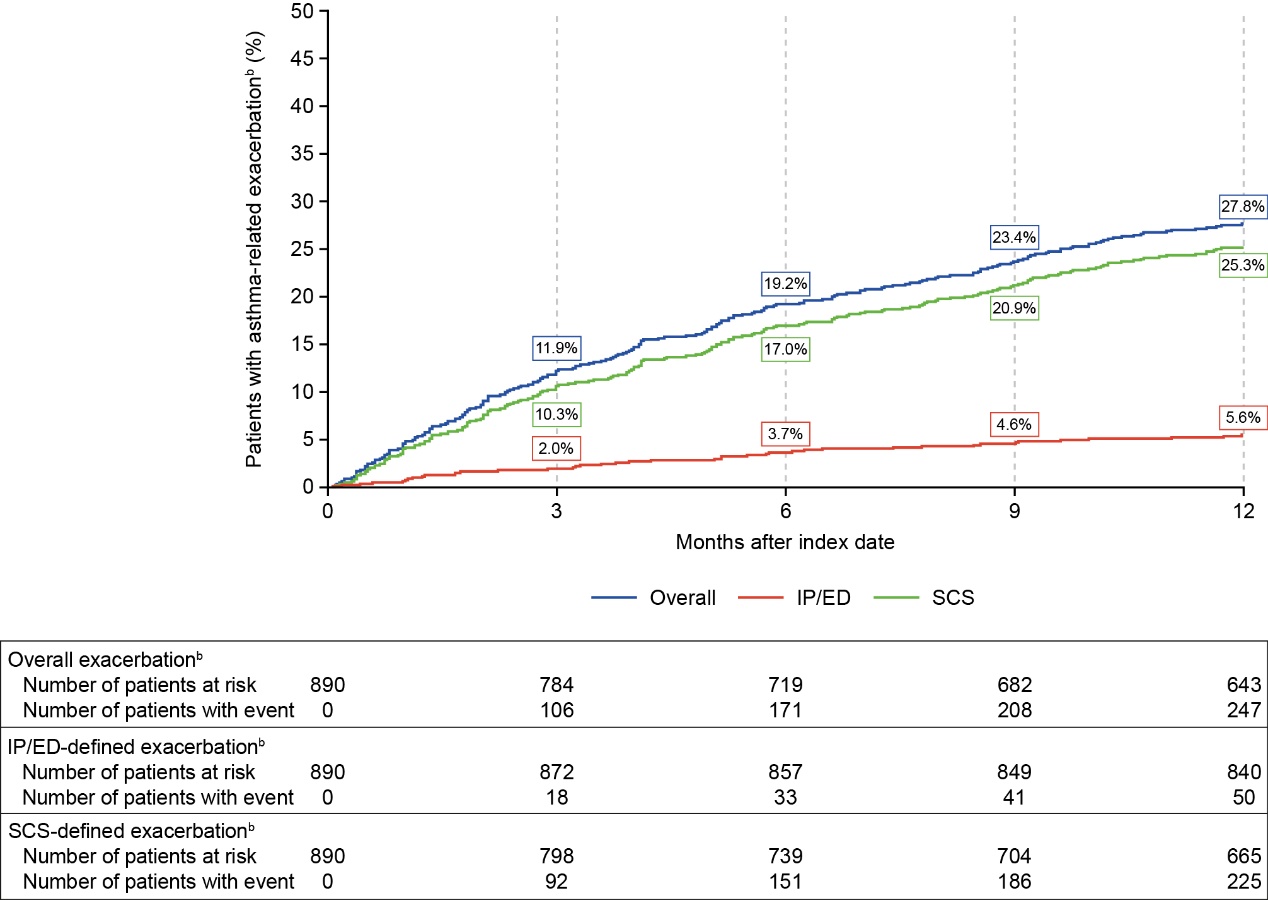


aThe post-treatment period spanned from the day after the index date to 12 months after the index date (i.e., excluding the index date).
bOverall asthma-related exacerbations included both SCS-defined and IP/ED-defined exacerbations. SCS-defined exacerbations were defined as an asthma-related ED visit or OP visit with an OCS or SCS dispensing/administration within ±5 days. IP/ED-defined exacerbations included hospitalization-defined and ED-defined exacerbations. Hospitalization-defined exacerbations were defined as an asthma-related hospitalization or asthma-related ED visit that results in a hospitalization within +1 day. ED-defined exacerbations were defined as an asthma-related ED visit. Asthma-related visits were identified as claims with a primary diagnosis of asthma.

ED: emergency department; FF, fluticasone furoate; IP: inpatient; SCS, systemic corticosteroid; UMEC, umeclidinium; VI, vilanterol.
